# Supplementary material for: An Expeditious and Greener Synthesis of 2-Aminoimidazoles in Deep Eutectic Solvents
Source: MDPI journal article supplement (doi:10.3390/molecules21070924), 2016-07-16

# Supplementary Materials: An Expeditious and Greener Synthesis of 2-Aminoimidazoles in Deep Eutectic Solvents

Martina Capua, Serena Perrone, Filippo Maria Perna, Paola Vitale, Luigino Troisi<sup>1</sup>, Antonio Salomone and Vito Capriati

1. General procedure for the synthesis of 2-aminoimidazoles **3a–g** in THF S2
2. General procedure for the synthesis of 2-aminoimidazoles **3h,i** in EtOH S2
3. Copies of the <sup>1</sup>H and <sup>13</sup>C-NMR spectra for compounds **3a–i** S3–S11

*Synthesis of 2-Aminoimidazoles 3a–g in THF (Table 1, Main Manuscript)*

The appropriate  $\alpha$ -chloroketone **1** (1.0 mmol), guanidine **2a** (1.3 mmol) and Et<sub>3</sub>N (1 mmol) were added to dry THF (6 mL), under an argon atmosphere and magnetic stirring, and the mixture was then heated under reflux for a period of 10–12 h, until the ketone **1** disappeared, as revealed by GC-MS analysis. After this time, the mixture was cooled to room temperature and 10 mL of H<sub>2</sub>O were added. The resulting aqueous solution was then extracted with AcOEt (3 × 10 mL). The combined organic phases were dried over Na<sub>2</sub>SO<sub>4</sub> and concentrated in vacuo. The crude product was purified by flash-chromatography (silica gel; petroleum ether/AcOEt 80:20–95:5) to give products **3a–g**.

*Synthesis of 2-Aminoimidazoles 3h,i in EtOH (Table 1, Main Manuscript)*

Guanidinium carbonate **2b**·H<sub>2</sub>CO<sub>3</sub> (1.3 mmol) and KOH (1.3 mmol) were added to EtOH (6 mL) under magnetic stirring, and the mixture was then heated under reflux for a period of 30 min, so as to liberate the free base of guanidine **2b** in situ. After this time,  $\alpha$ -chloroketone **1** and triethylamine (1.3 mmol) were added and the reaction stirred at reflux for 10–12 h until the ketone **1** disappeared, as revealed by GC-MS analysis. The reaction mixture was then cooled to room temperature and 10 mL of H<sub>2</sub>O were added. The resulting aqueous solution was extracted with AcOEt (3 × 10 mL), and the combined organic phases were dried over Na<sub>2</sub>SO<sub>4</sub> and concentrated in vacuo. The crude product was purified by flash-chromatography (silica gel; petroleum ether/AcOEt 20:80–40:60) to give products **3h–i**.

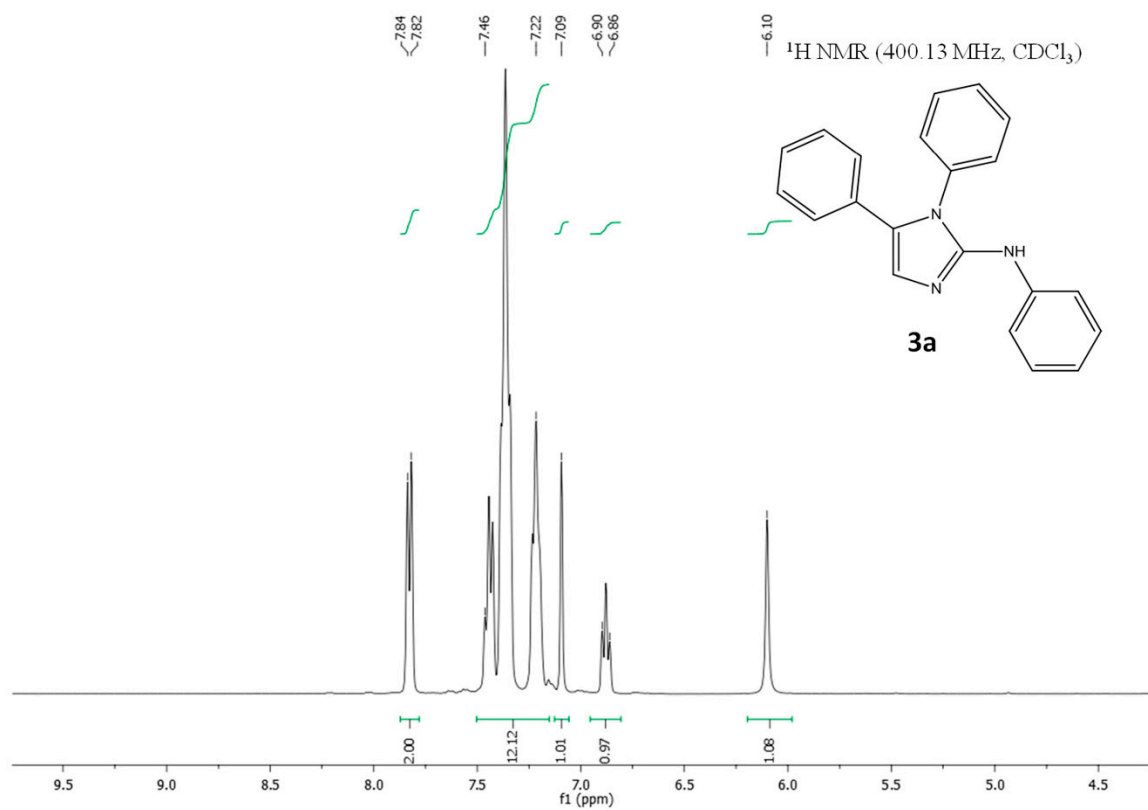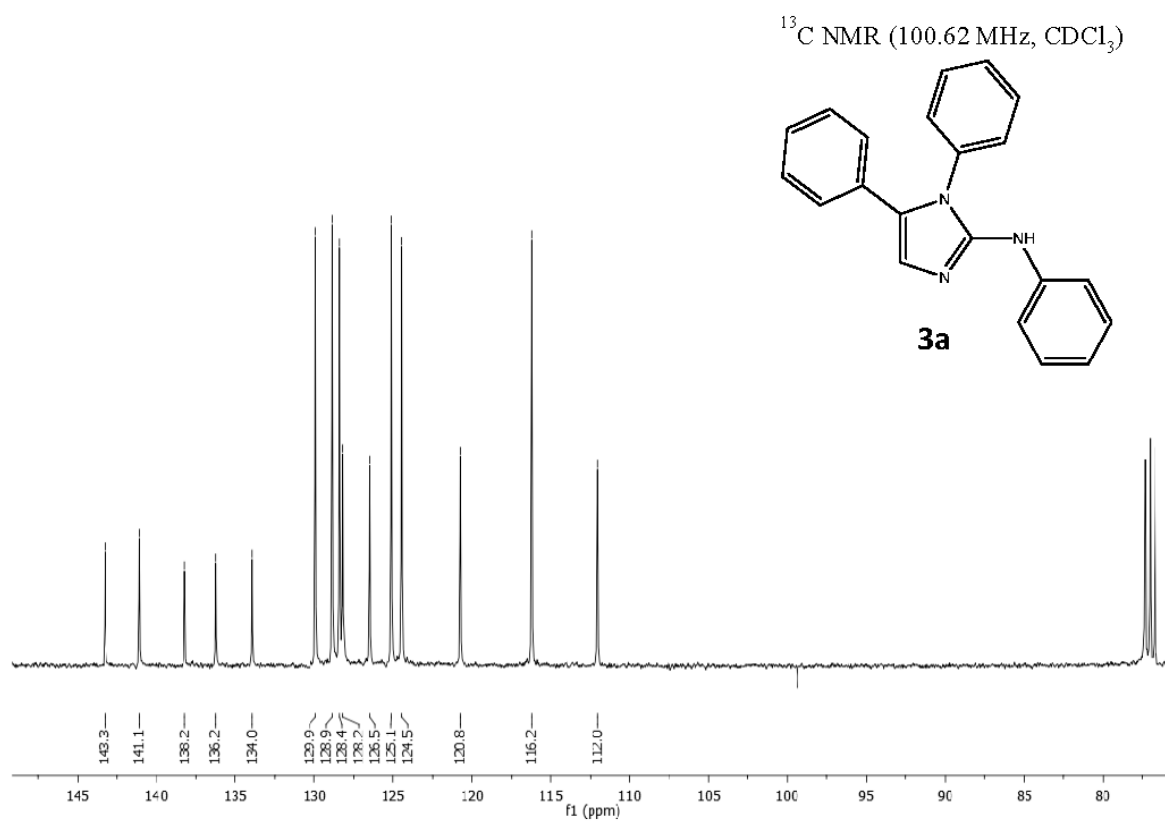

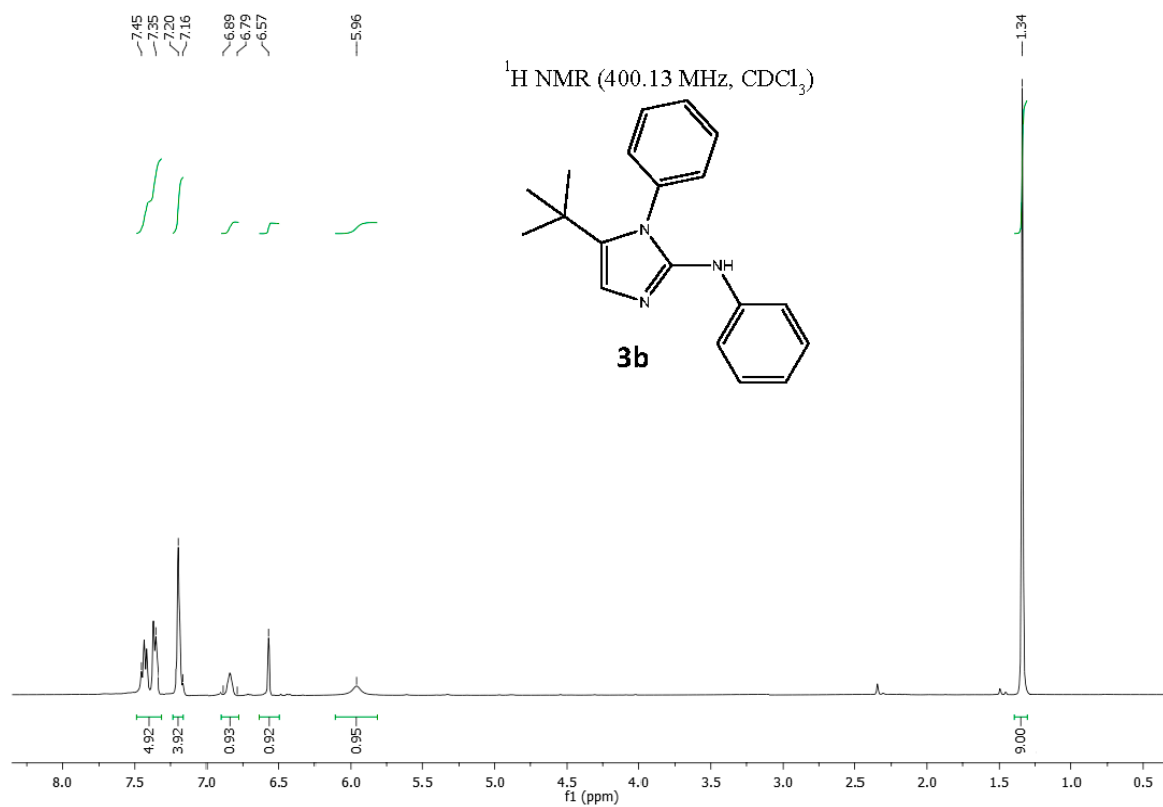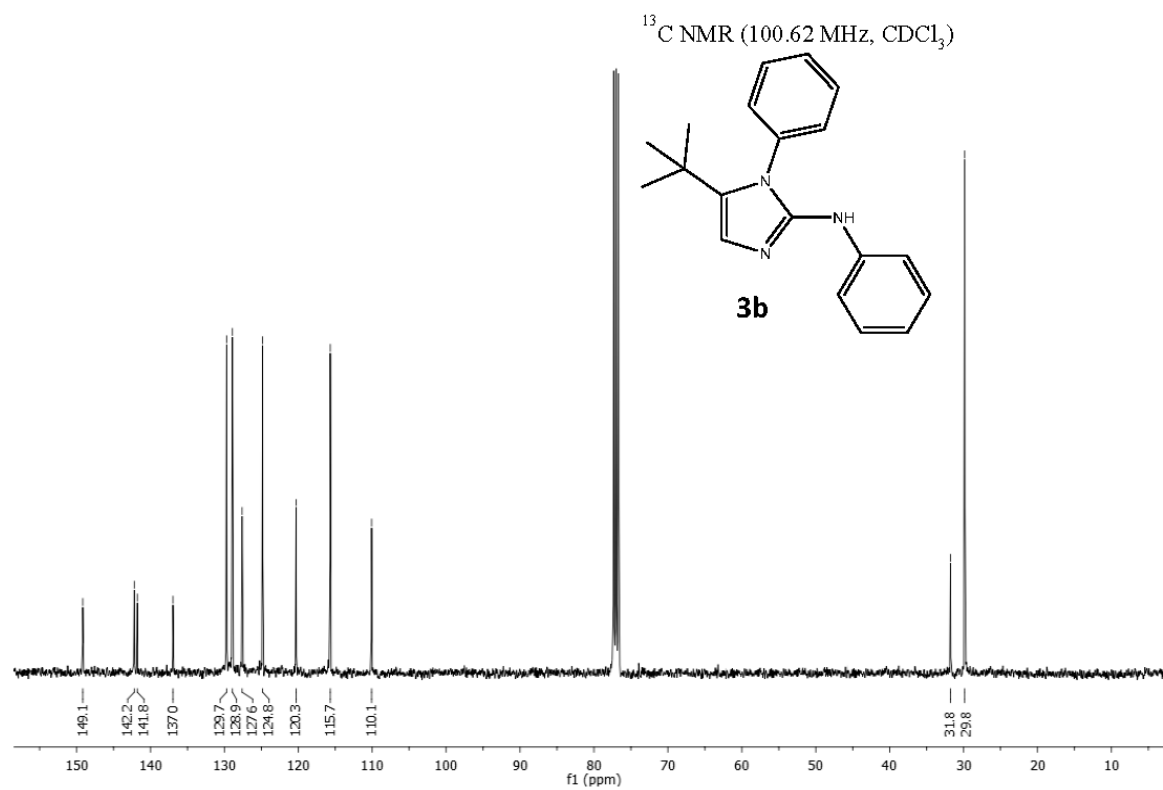

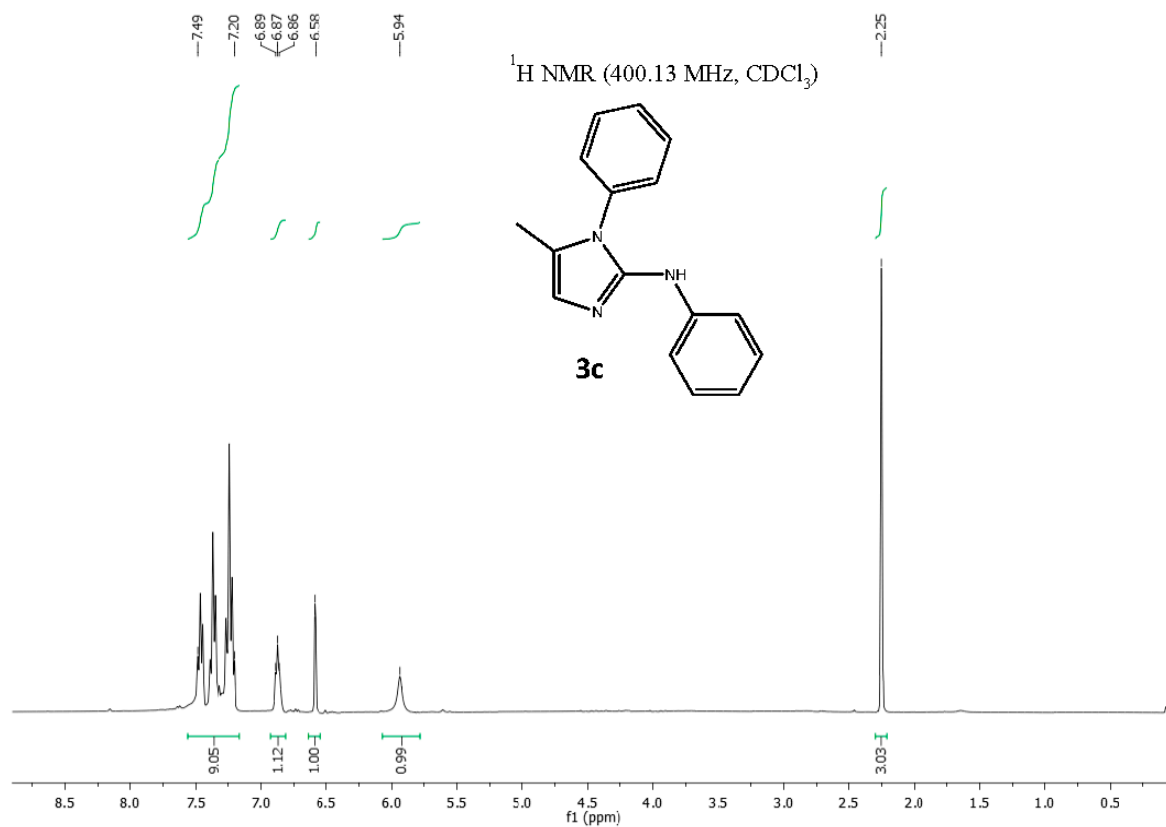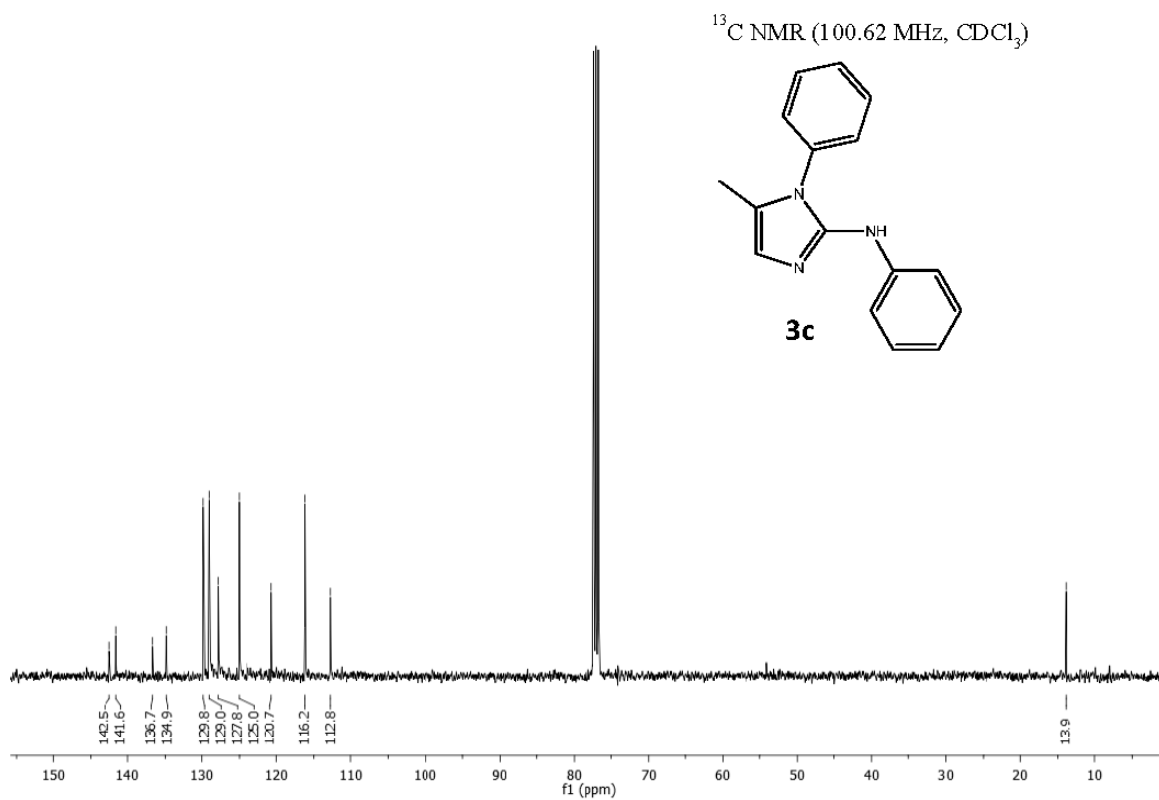

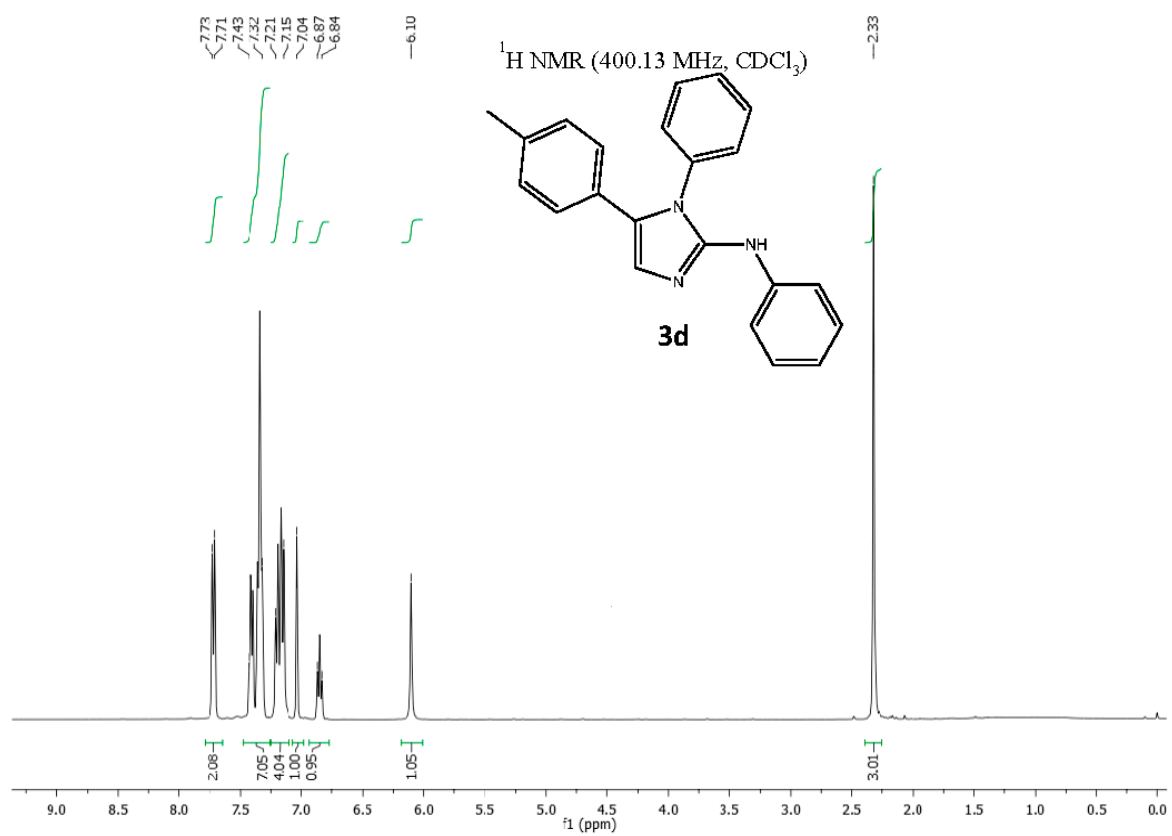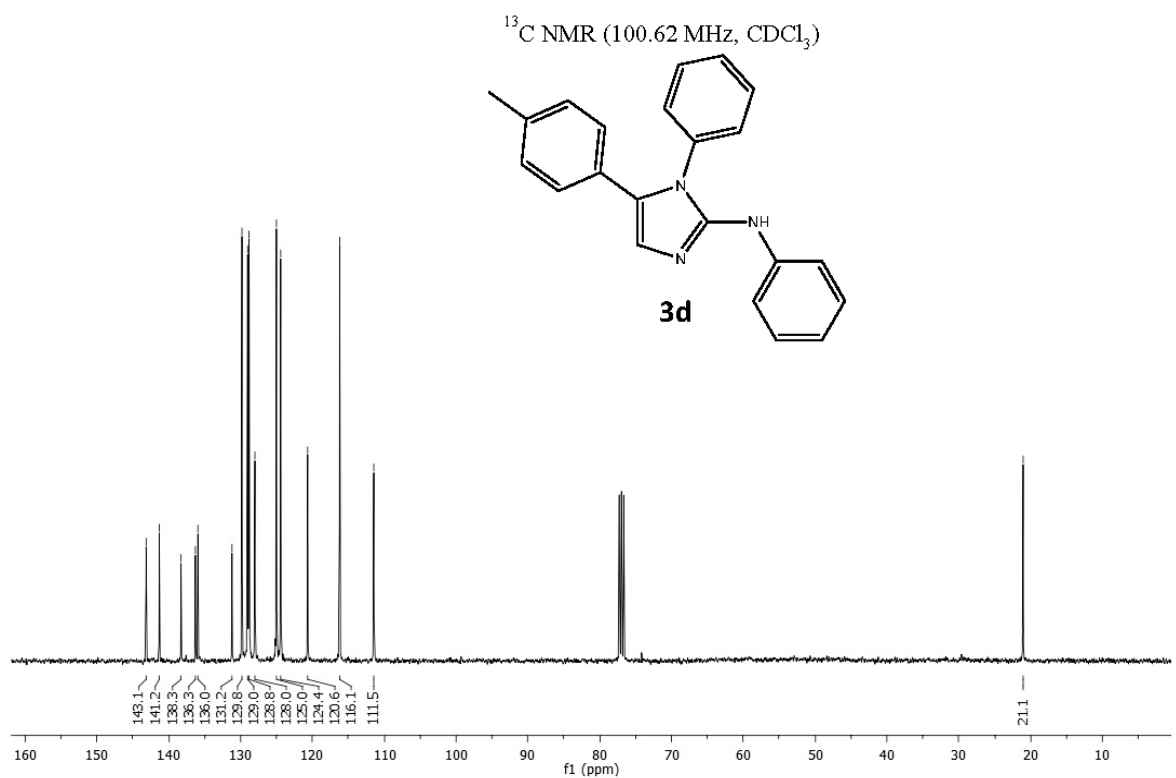

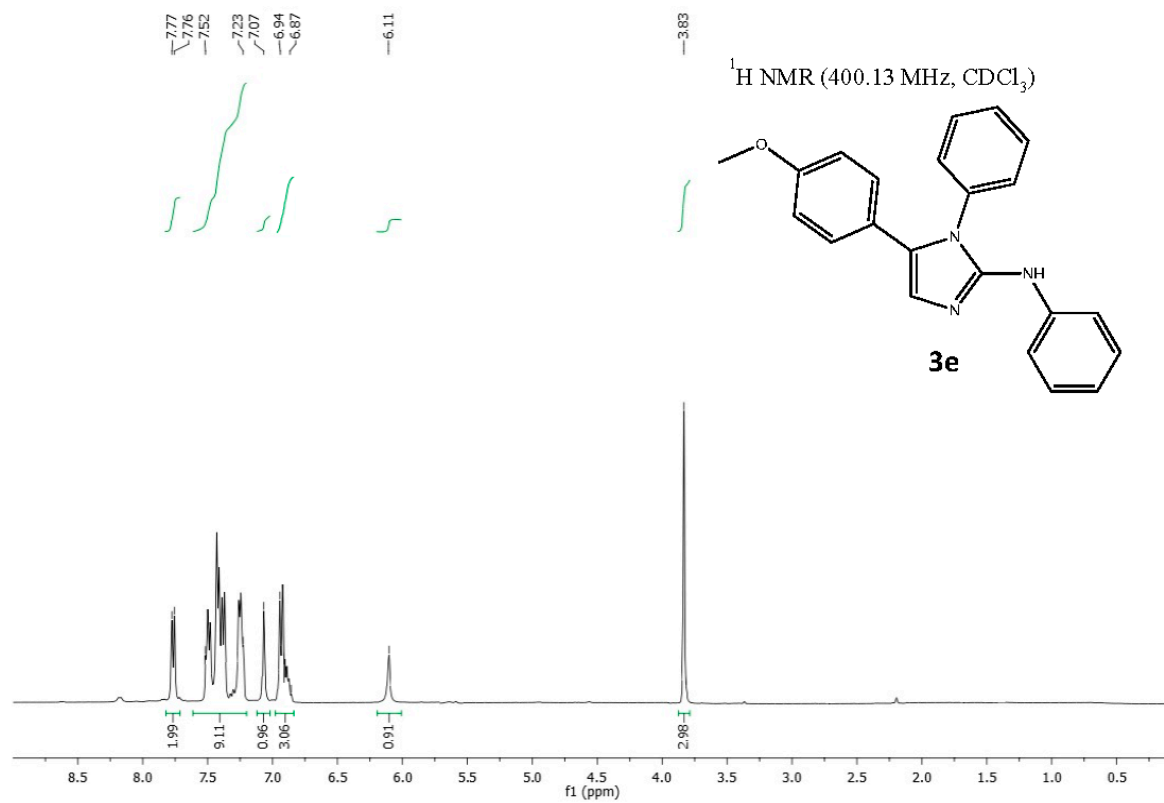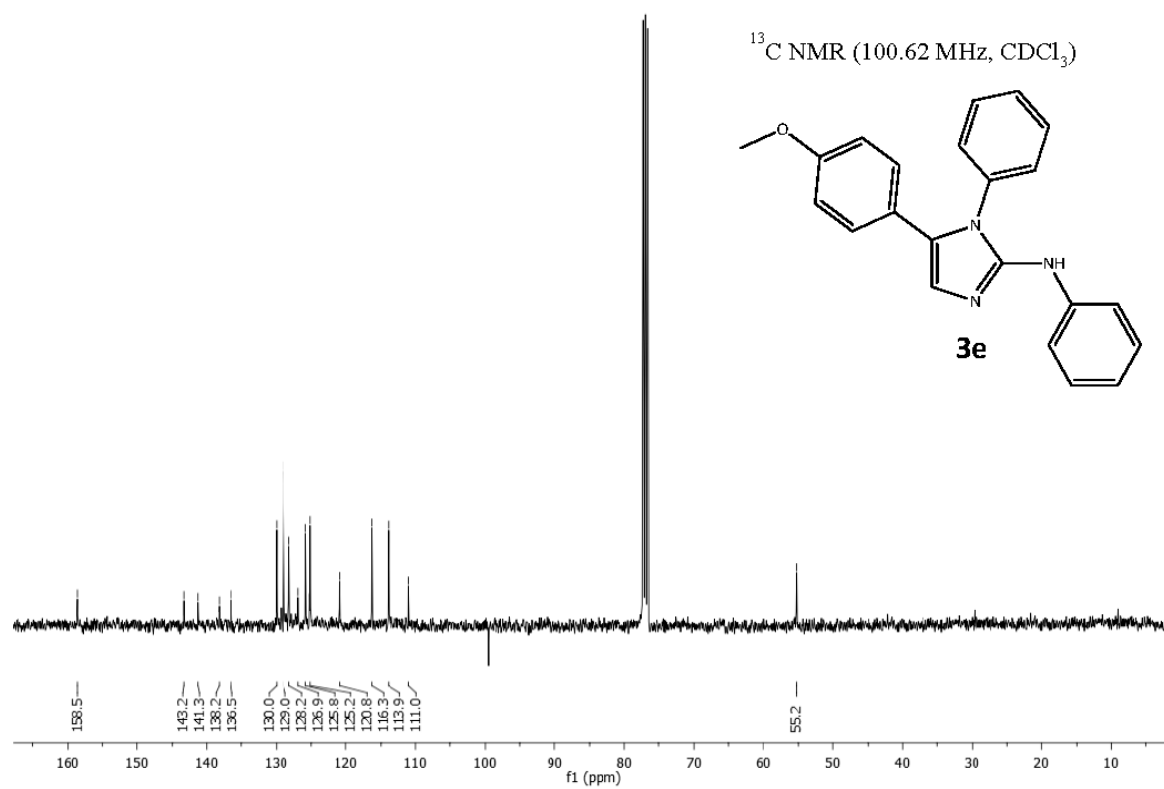

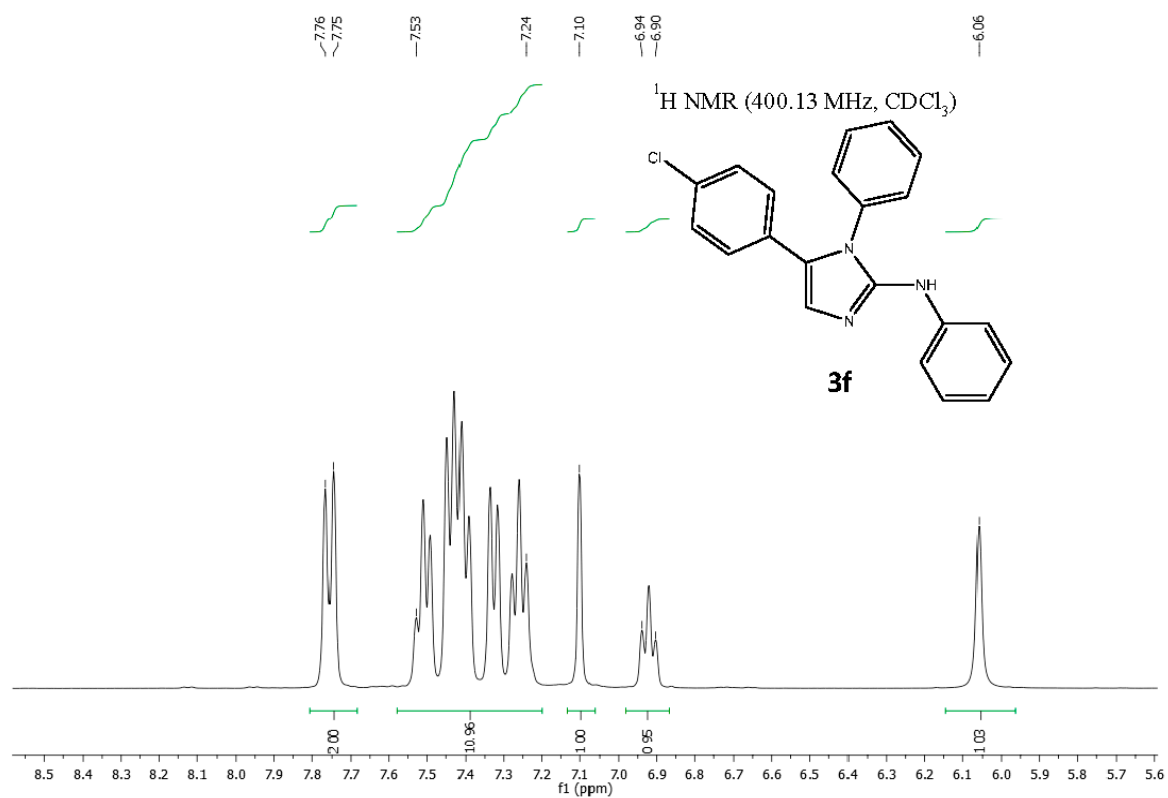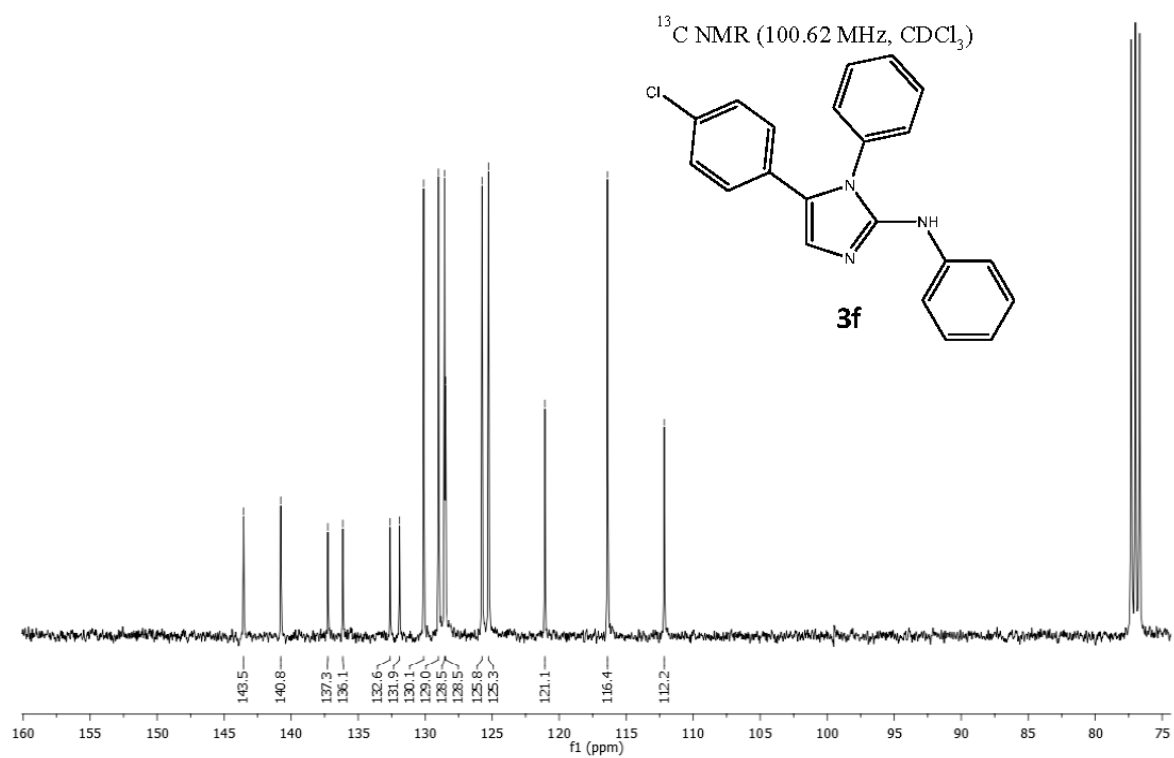



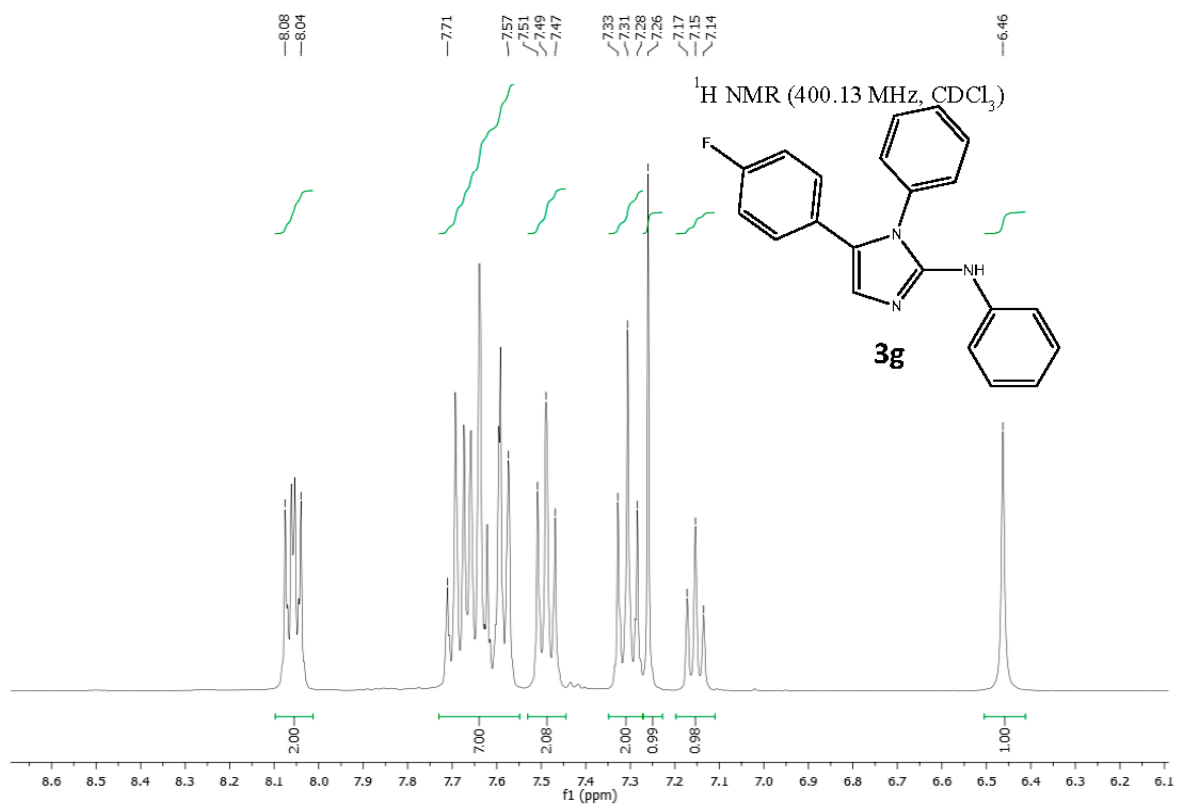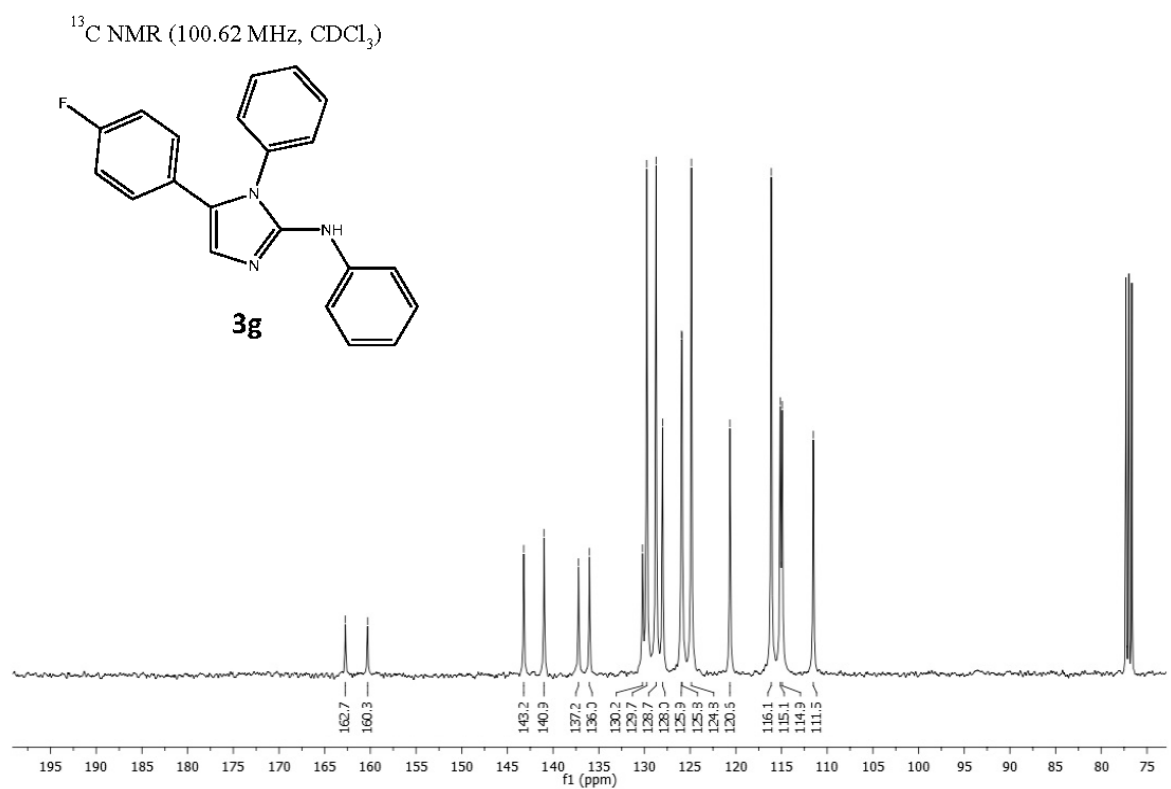

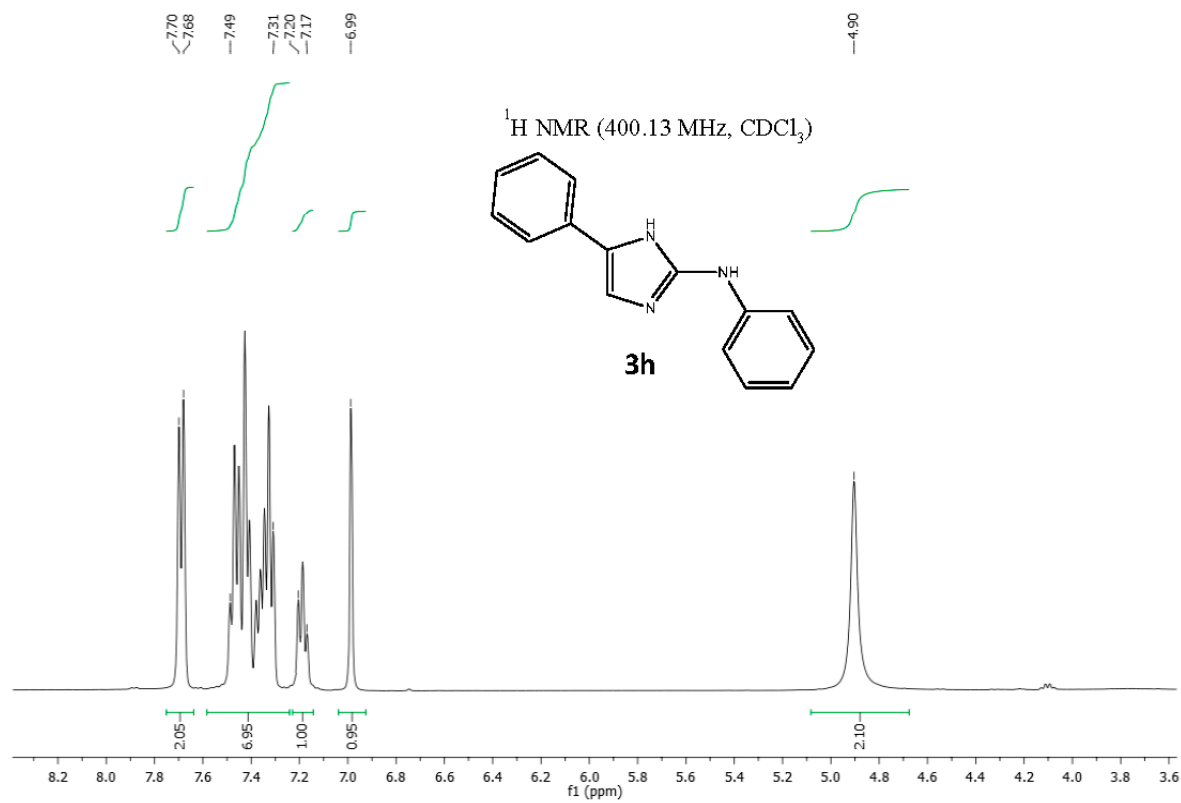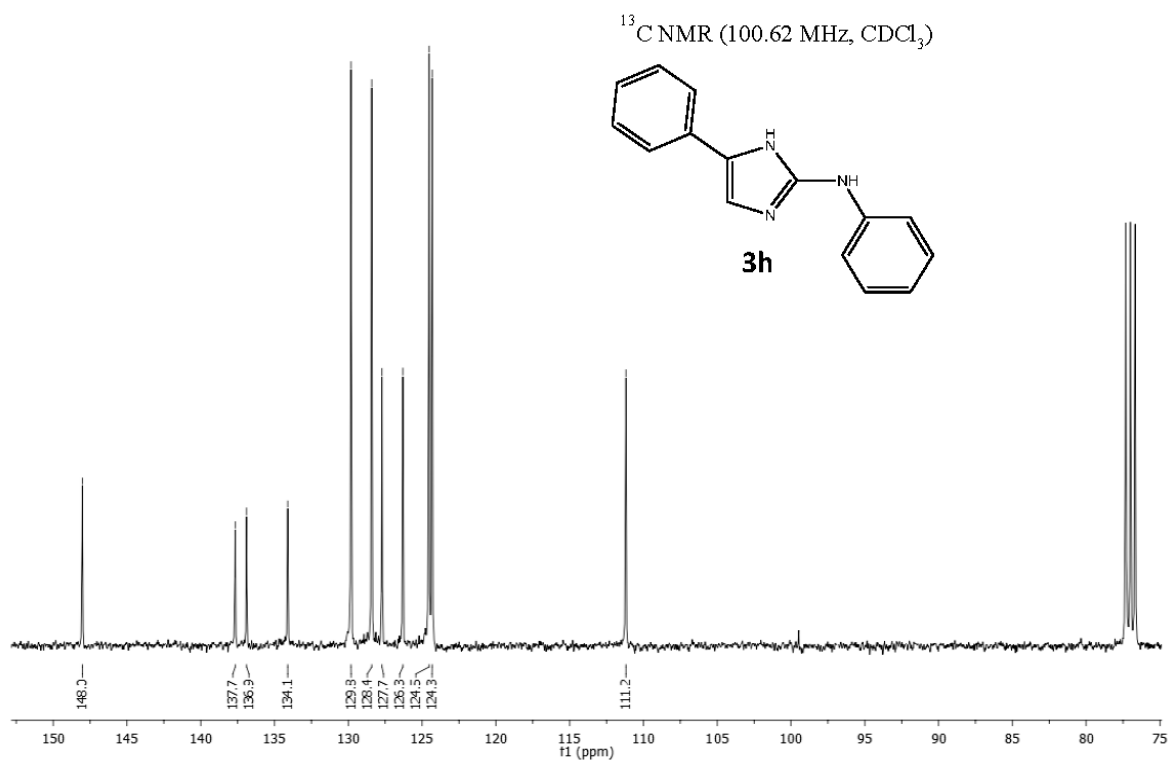

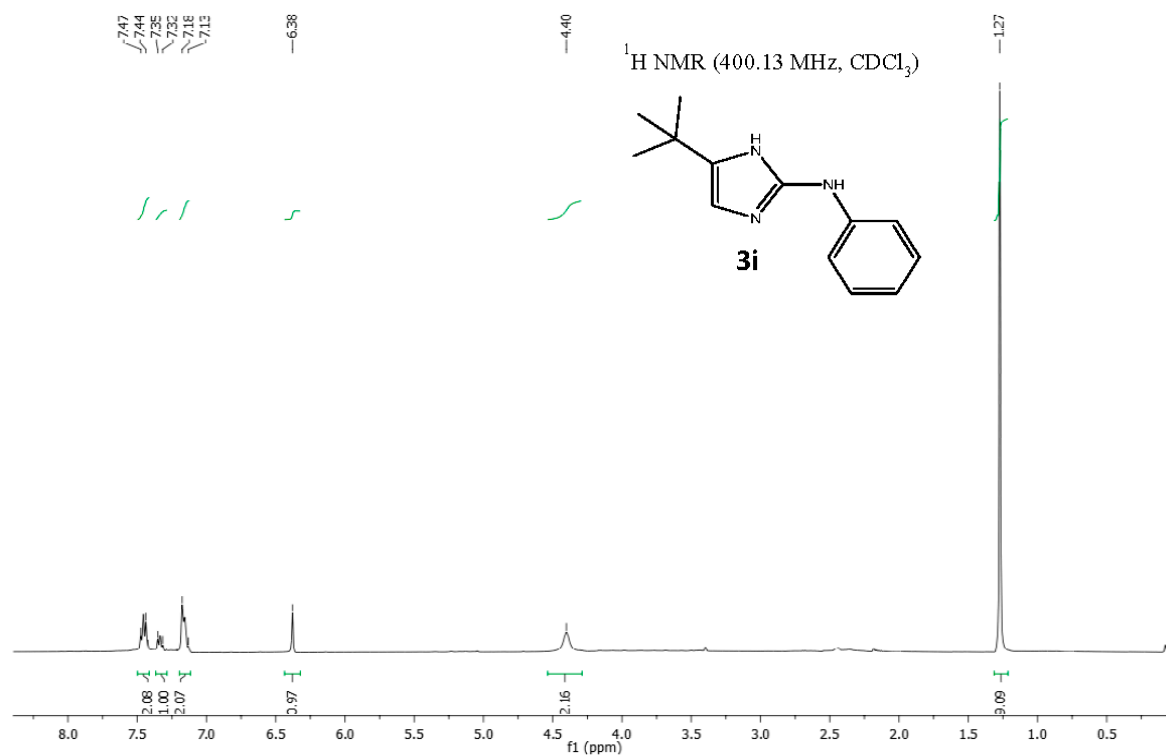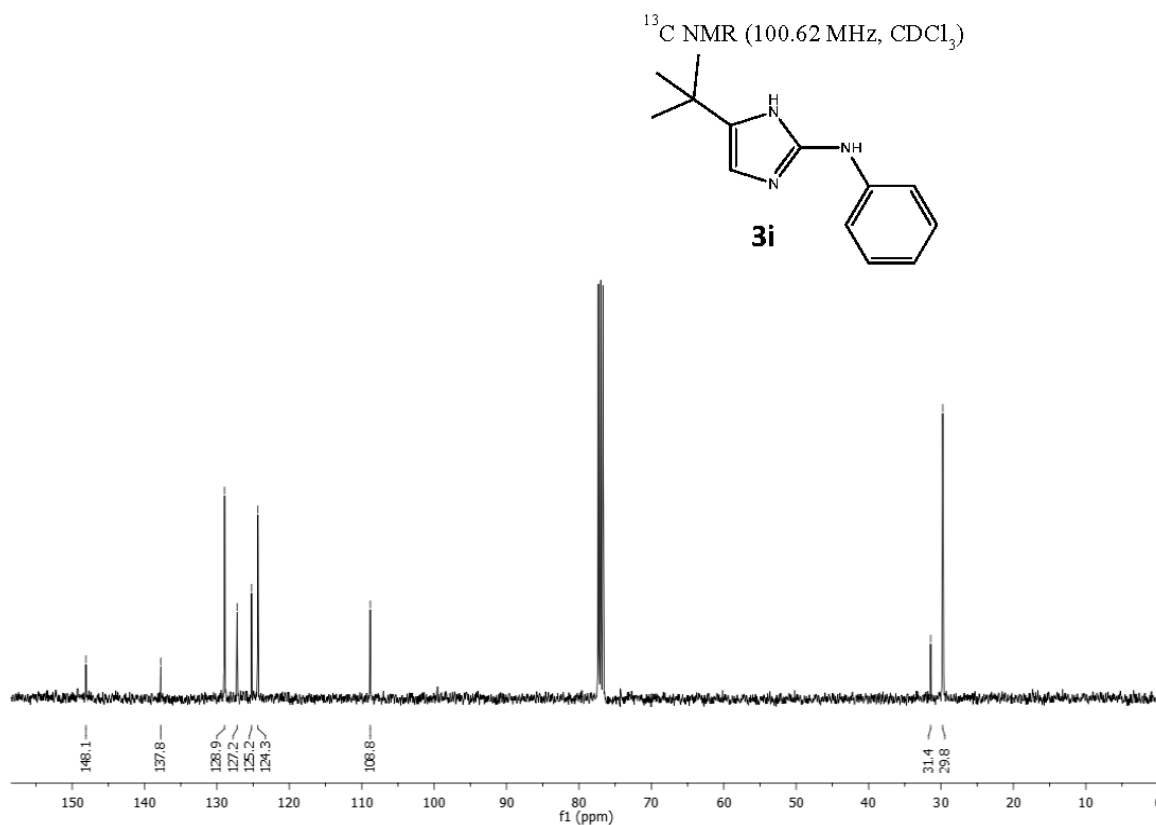

Supplement: s1 [file s1]
